# Supplementary material for: Nrf2 activation is associated with Z-DNA formation in the human HO-1 promoter
Source: PubMed Central journal article supplement — Nucleic Acids Res. 2013 Apr 8;41(10):5223–34. doi: 10.1093/nar/gkt243 (PMC3664823; doi:10.1093/nar/gkt243), 2013-04-08
Supplement: supp_gkt243_nar-03393-f-2012-File011.pdf [file supp_gkt243_nar-03393-f-2012-File011.pdf]

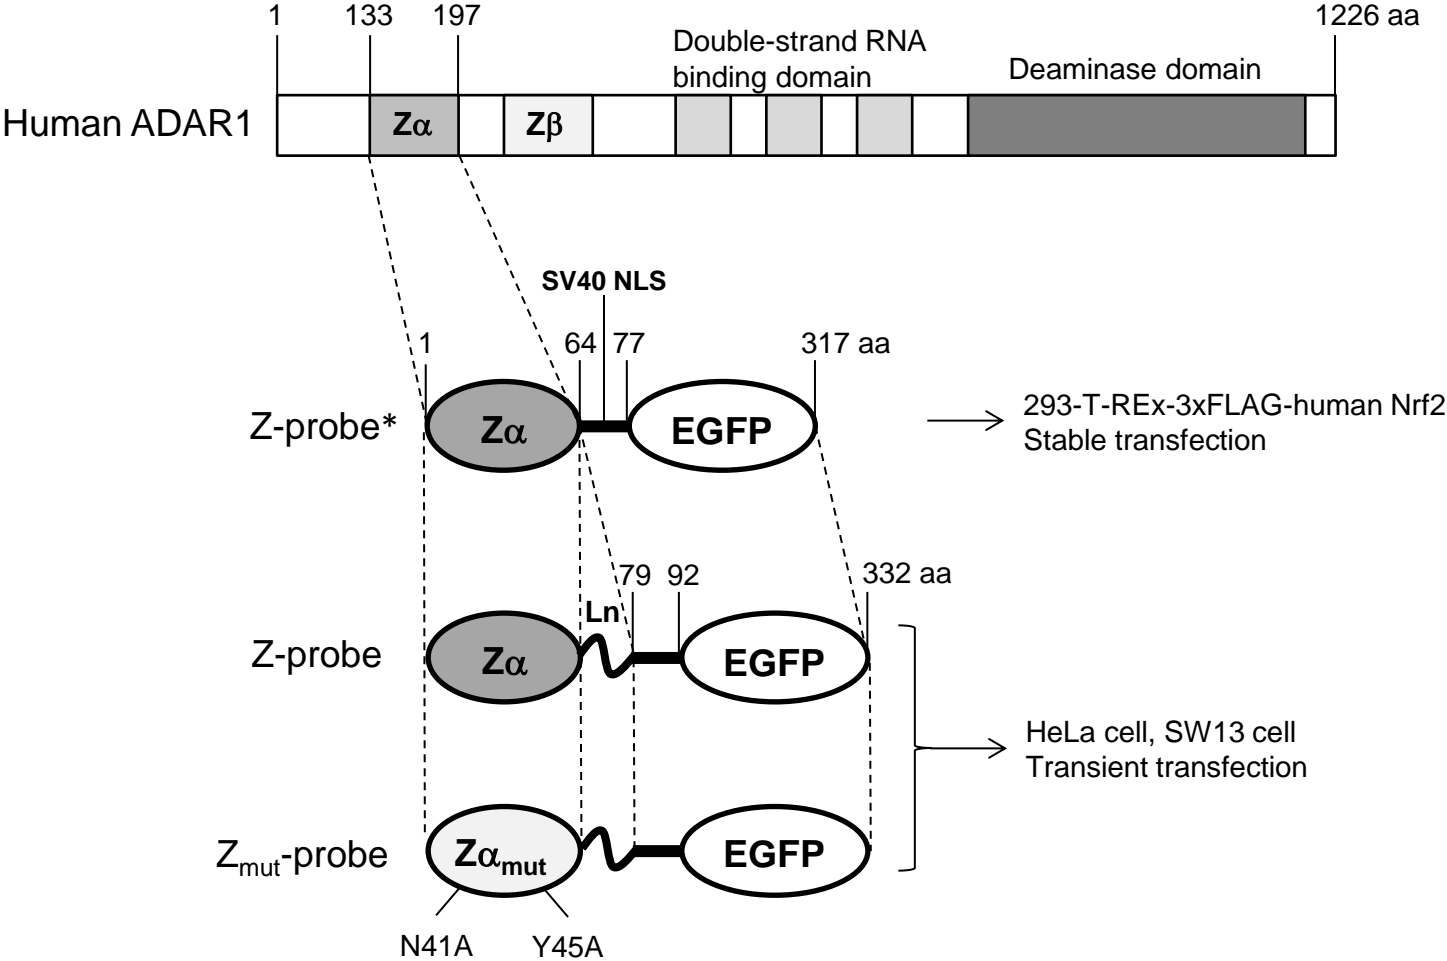

Supplemental Figure S1. Z-probes used in this study.

Z-probe\* lacks a (Gly<sub>4</sub>-Ser)<sub>3</sub> flexible linker region and its expression plasmid was stably transfected into 293-T-REx-3xFLAG-human Nrf2 cells. A flexible linker was inserted into Z-probe. Both N41A and Y45A mutation were introduced into Z $\alpha$  domain of Z-probe, and designed Zmut-probe. Z-probe and Zmut-probe were transiently transfected into HeLa or SW13 cells for analyses. Amino acid (aa) numbers correspond to the residue number in each protein.

Supplemental Figure S2\_Maruyama et al.

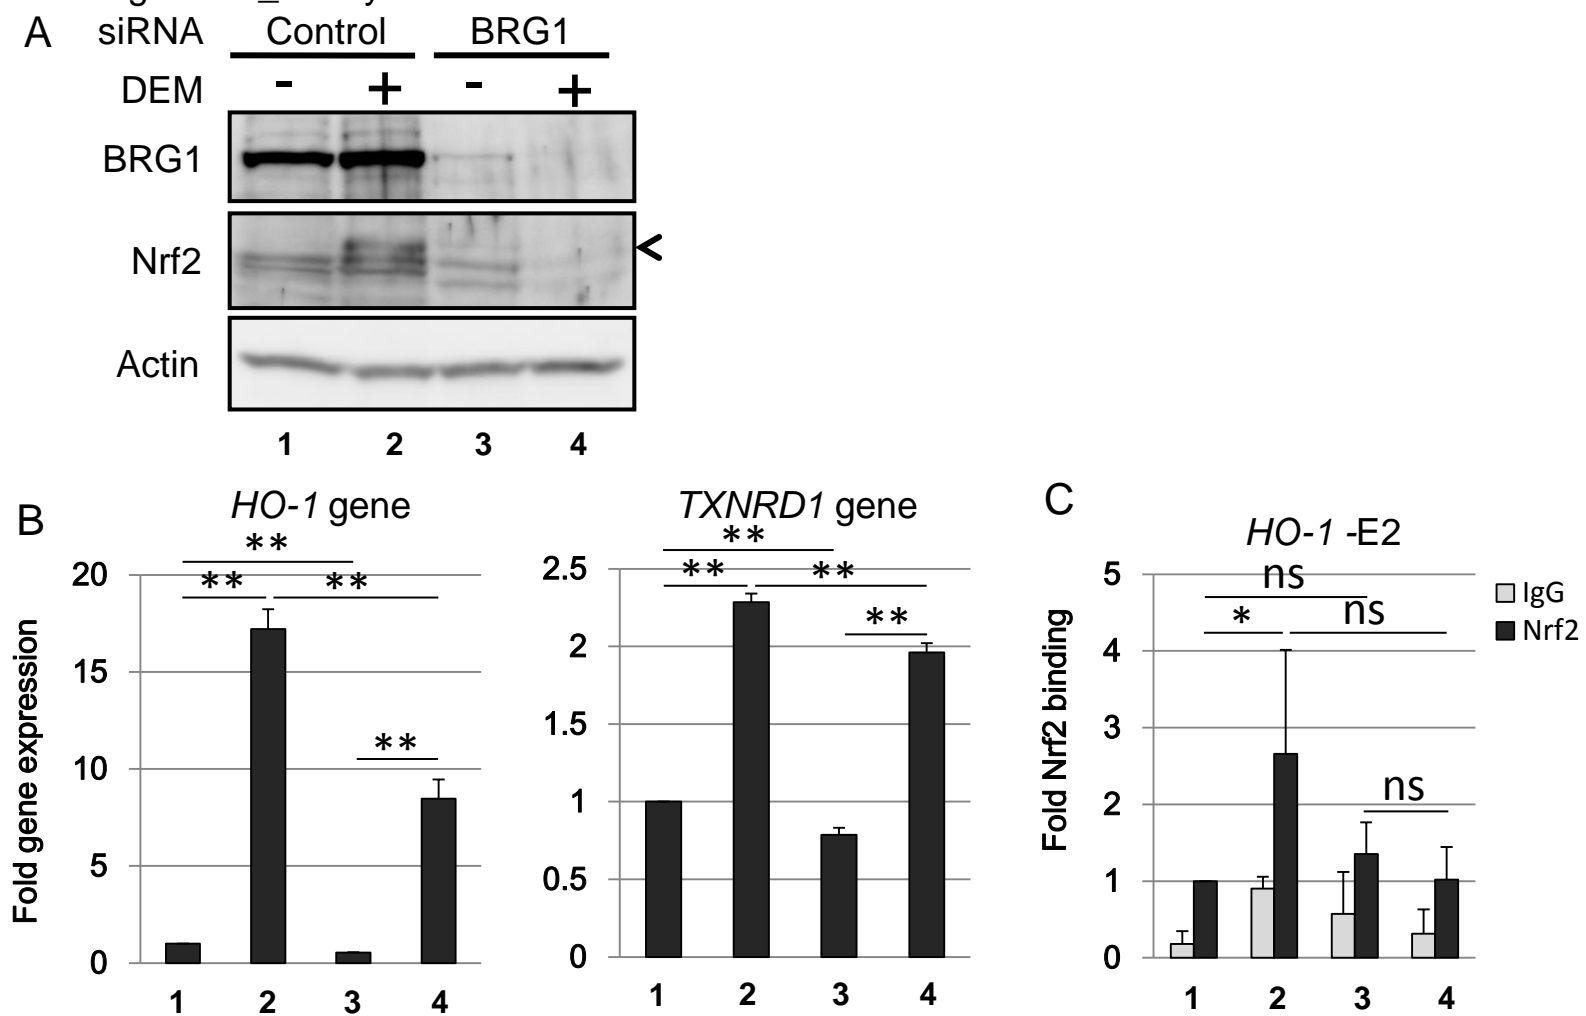

Supplemental Figure S2. Effect of BRG1 knockdown in HeLa cells.

HeLa cells were transfected with control siRNA (Control) or BRG1-specific siRNA (BRG1), and then cells were exposed to 100  $\mu$ M DEM for 3 hours. (A) Whole cell lysates were separated on SDS-PAGE and protein expressions were analyzed by immunoblot using specific antibodies indicated on the left of panels. (B) The *HO-1* and *TXNRD1* gene expression was analyzed by realtime PCR using specific primer sets. The value of lane 1 was set as 1. (C) ChIP assay was performed using anti-Nrf2 antibody (black bars). Normal rabbit IgG was used as a negative control (gray bars). Fold Nrf2 binding was measured by realtime PCR using specific primer set for *HO-1* E2 enhancer region (*HO-1*-E2). Lane numbers indicated below bars correspond to the sample numbers of (A). DEM-induced Nrf2 expression was attenuated in BRG1 knockdown cells compared to control cells (A). The *HO-1* gene expression was down-regulated in BRG1 knockdown cells (B). The Nrf2 binding to *HO-1* E2 enhancer was induced by DEM in control siRNA-transfected cells, but not in BRG1 knockdown cells. The value of lane 1 was set as 1 and relative bindings were expressed as means  $\pm$  SEM of three independent assays. \*:  $P < 0.05$ , \*\*:  $P < 0.01$  (two-tailed unpaired Student's *t*-test). ns: no significant difference.
